# Supplementary material for: Genetic variation in interleukin-7 is associated with a reduced erythropoietic response in Kenyan children infected with Plasmodium falciparum
Source: BMC Med Genet. 2019 Aug 16;20:140. doi: 10.1186/s12881-019-0866-z (PMC6698010; doi:10.1186/s12881-019-0866-z)
Supplement: Supplementary file 3 — Questionnaire. Demographic and clinical data collected at enrollment. (XLS 494 kb) [file 12881_2019_866_MOESM3_ESM.xls]

## Sheet: Enrollment_Pediatric
Study Site (Siaya County Referral Hospital)						Study No:
Volunteer's surname : _ _ _ _ _ _ _ _ _ _ _ _ _ _ _ _ _ _ _ _ _ _ _ _ _ _ _ _
Volunteer's first name: _ _ _ _ _ _ _ _ _ _ _ _ _ _ _ _ _ _ _ _ _ _ _ _ _ _ _ _							In/Out patient No:
Volunteer's mid name: _ _ _ _ _ _ _ _ _ _ _ _ _ _ _ _ _ _ _ _ _ _ _ _ _ _ _ _
Date of Birth:					Age:		months	Gender:
Marital status (if Adult)					Mariage type (If married)
Admission / Recruitment Date:
Phone No: _ _ _ _ _ _ _ _ _ _ _ _ _ _ _			Village/Estate: _ _ _ _ _ _ _ _ _ _ _ _ _ _ _ _ _ _ _				Nearest health Center: _ _ _ _ _ _ _ _ _ _ _ _
Sub-County: _ _ _ _ _ _ _ _ _ _ _ _ _ _ _ _			Homestead _ _ _ _ _ _ _ _ _ _ _ _ _ _ _ _ _ _				Chief: _ _ _ _ _ _ _ _ _ _ _ _ _ _ _ _ _ _ __ _ _ _
Location: _ _ _ _ _ _ _ _ _ _ _ _ _ _ _			Nearest school: _ _ _ _ _ _ _ _ _ _ _ _				Assistant chief: _ _ _ _ _ _ _ _ _ _ _ _ _ _ _ _ _ _
Sub-Location: _ _ _ _ _ _ _ _ _ _ _ _ _ _ _ _ _			Nearest market: _ _ _ _ _ _ _ _ _ _ _ _				Village elder:_ _ _ _ _ _ _ _ _ _ _ _ _ _
Geocoding information
Elevation	M		Degrees	Decimal Degrees
Longitude	E/W		Degrees	Decimal Degrees
Latitude	N/S		Degrees	Decimal Degrees
Primary caretaker/Next of kin information
Name:_ _ _ _ _ _ _ _ _ _ _ _ _ _ _ _ _ _ _				Last Names:_ _ _ _ _ _ _ _ _ _ _ _ _ _ _ _ _ _ _ _ _ _ _ _ _ _
Relationship:_ _ _ _ _ _ _ _ _ _ _ _ _ _ _				Other (specify) _ _ _ _ _ _ _ _ _ _ _ _ _				Phone number :_ _ _ _ _ _ _ _ _ _ _
Ethnic group:		Luo	Luhya	Kisii	Other (specify)_ _ _ _ _ _ _ _ _ _ _ _ _ _ _ _ _ _ _ _ _ _ _ _ _ _
Highest level of education: (check as appropriate)
Head of Household's Occupation			(check all that apply)		Mother's Occupation if Not Head of Household				(check all that apply)
Subsistence Farmer						Subsistence Farmer
Fisherman						Business Person/Trader
Business Person/Trader						Cattle Farmer
Cattle Farmer						Teacher
Teacher						Other (specify) _ _ _ _ _ _ _ _ _ _ _ _ _ _ _ _ _ _ _
Other (specify) _ _ _ _ _ _ _ _ _ _ _ _ _ _ _ _ _ _ _
House contacts
																						P
Do you keep any animal(s) within the house-hold? If yes check all that apply
Cat(s)	Sheep	Goat(s)	Cattle	Pig(s)	Poultry	Donkey(s)	Dog(s)
No.	No.	No.		No.	No.	No.
			(check all that apply)
Type of Construction:			Type of Roof:			Type of Window:
Mud-walled			Grass-thatched			None
Brick-walled			Tin-roof			Screened Windows
Timber-walled			Corrugated Iron			Unscreened Windows
Tin-walled			Other (specify) _ _ _ _ _ _ _ _ _ _ _ _ _ _ _ _ _ _ _ _ _ _ _ _ _
Study No:					Exam Date:
PHYSICAL MEASURE
Temperature (auxillary) OPD			_ _ _ _0C			Weight		_ _ _ _kg
Temperature (auxillary) UNM			_ _ _ _0C			Height		_ _ _ _cm
Respiratory Rate			_ _ _ _ in 1 min.			Head circumference		_ _ _ _cm
Pulse			_ _ _ _ in 1 min.			Arm circumference		_ _ _ _cm
Blood Pressure			_ _ _ _ in mmHg.
PRESENTING SIGNS/SYMPTOMS
(check all that apply)
Chest Pain					Diarrhoea:
Drenching Sweats					Difficult breathing:
Cough					Convulsions:
Fever:					Abdominal pains:
Oedema:					Vomiting:
Pallor:					Headache:
Jaundice					Unresponsiveness:
Poor Feeding:					Others: _ _ _ _ _ _ _ _ _ _ _ _ _ _ _ _ _ _ _ _ _ _ _ _ _ _ _ _
Is the child currently breastfeeding?
If No, at what age (in months) was the child last breastfed?
Which of the following malaria prevention methods are used in the home (check all that apply)
Mosquito Nets			Mosquito Repellant Gel			Other (specify) _ _ _ _ _ _ _ _ _ _ _ _
Mosquito Coils/Sprays			None			Other (specify) _ _ _ _ _ _ _ _ _ _ _ _
TREATMENT HISTORY
Has the child received any medications in the past week?
(if yes note down on the table below)
Drug name						Strength	Unit	Form	Frequency	Remarks
1)
2)
3)
4)
5)
Has the child been hospitalised before?
If Yes, specify number of months:
0 -1	1 - 3	3 - 6	6 - 12	12 - 24	24 - 36
Where was the child hospitalised? _ _ _ _ _ _ _ _ _ _ _ _ _ _ _ _ _ _ _ _ _ _ _ _ _ _ _ _ _ _
Reason for hospitalisation: _ _ _ _ _ _ _ _ _ _ _ _ _ _ _ _ _ _ _ _ _ _ _ _ _ _ _ _ _ _ _ _ _ _
Has the child ever been transfused?						If Yes, when was the last transfusion?
How many times? _ _ _ _ _ _
Where was the child transfused?_ _ _ _ _ _ _ _ _ _ _ _ _ _ _ _ _ _ _ _ _ _ _
Reason for transfusion: _ _ _ _ __ _ _ _ _ _ _ _ _ _ _ _ _ _ _ _ _ _ _ _ _ _ _
Has the child ever participated in this study before?
Has this child been treated elsewhere for this illness?
If "Yes", then where?
		1 = Government Hospital/Dispensary				4 = Chemist
		2 = Private Clinic/Nursing Home				5 = Traditional Healer
		3 = Duka				6 = Community Healthworker
HEALTHCARE SOURCE		CODE	DATE		TREATMENT RECEIVED			IMPROVED (Yes/No)
FAMILY HISTORY
TB contact:				Mother tetanus vaccine?				Mother well:
Epilepsy:				Child's vaccines current?
Diabetes:				Parents separated?
Allergy:				Siblings alive:				Father well:
Birth history:				Siblings deceased:
					Study No:
					Physical Exam Date:
Noted symptoms:
Nasal Flaring
Grunting					Spleen Size		_ _ _ _cm below left costal margin
Chest in-drawing					Liver Size		_ _ _ _cm below right costal margin
Palmar pallor					Leg Oedema		_ _ _ _"yes" or "no"
Sunken eyes
Dry tongue/mucous membrane					Heart Exam		Normal	Abnormal
Skin pinch goes back slowly					Lung Exam		Normal	Abnormal
(> or = 2 seconds)					Ear Exam		Normal	Abnormal
Able to stand/sit unsupported
Jaundice
Oral thrush					Nutritional status		Good	Fair	Poor
Hepatomegaly					Dehydration		None	Mild	Severe
Splenomegaly					Pallor		None	Mild	Severe
Oral sores					Rash		None	Localized	Generalized
Lymphadenopathy					Eye signs		None	Redness	Discharge
Respiratory distress
Finger clubbing
Cardiac signs
Ascites
Neck stiffness
Neurological signs
Blantyre Coma		Caculate score using Blantyre Coma tool
			Blantyre Coma Scale (ref. 47)
Score	Motor Response		Verbal Response			Eye Movements
2	Localizes pain		Appropriate cry
1	Withdraws from pain		Inappropriate cry/moan			Directed eye movement
0	No response		No cry			Not Directed		Total
Scores
Comments for abnormalities: _ _ _ _ _ _ _ _ _ _ _ _ _ _ _ _ _ _ _ _ _ _ _ _ _ _ _ _ _ _ _ _ _ _ _ _ _ _ _ _ _ _ _ _ _ _ _
DISPOSITION (check all that apply)
DIAGNOSIS (check all that apply)
Drug name						Strength	Unit	Form	Frequency	Remarks
1)
2)
3)
4)
5)
Next follow-up date:					Examiner's signature:_ _ _ _ _ _ _ _ _ _ _ _ _ _ _ _
QA/QC Officer's signature:_ _ _ _ _ _ _ _ _ _ _ _ _ _ _ _					Supervisor's signature:_ _ _ _ _ _ _ _ _ _ _ _ _ _ _ _
